# Supplementary material
Source: publisher site journal article supplement (https://mbmg.pensoft.net/article/download/suppl/3916250/)
Supplement: Supplementary file 1

**Supplementary Table 2.** Species level taxa (BOLD Data). Underlined taxa were changed based on the distribution of taxa in the study zone (‘*’ indicates that the column contains no taxa):

| Merino Only | Dorper Only | Goat Only* | Dorper and Merino | Merino and Goat | Dorper and Goat | Dorper, Merino and Goat |
| --- | --- | --- | --- | --- | --- | --- |
| Brassicaceae species | *Erodium cygnorum* |  | *Atriplex* sp. | *Austrostipa* sp. | *Marsilea* sp. | *Eucalyptus* sp. |
| *Lotus* sp. | *Erodium* sp. |  | *Austrostipa nodosa* |  |  | *Medicago minima* |
| *Sclerolaena obliquicuspis* | *Limonium* sp. |  | *Calotis* sp. |  |  | *Medicago sativa* |
|  | *Medicago polymorpha* |  | *Convolvulus* sp. |  |  | *Medicago* sp. |
|  | *Senecio* sp. |  | *Maireana* sp. |  |  | *Sclerolaena* sp. |
|  | *Sonchus tenerrimus* |  | *Tetragonia* sp. |  |  |  |
|  |  |  | *Vittadinia sulcata* |  |  |  |
